# Supplementary material for: A protein palmitoylation cascade regulates microtubule cytoskeleton integrity in Plasmodium
Source: PubMed Central journal article supplement (PMC7327484; doi:10.15252/embj.2019104168), 2020-05-12

Figure 2

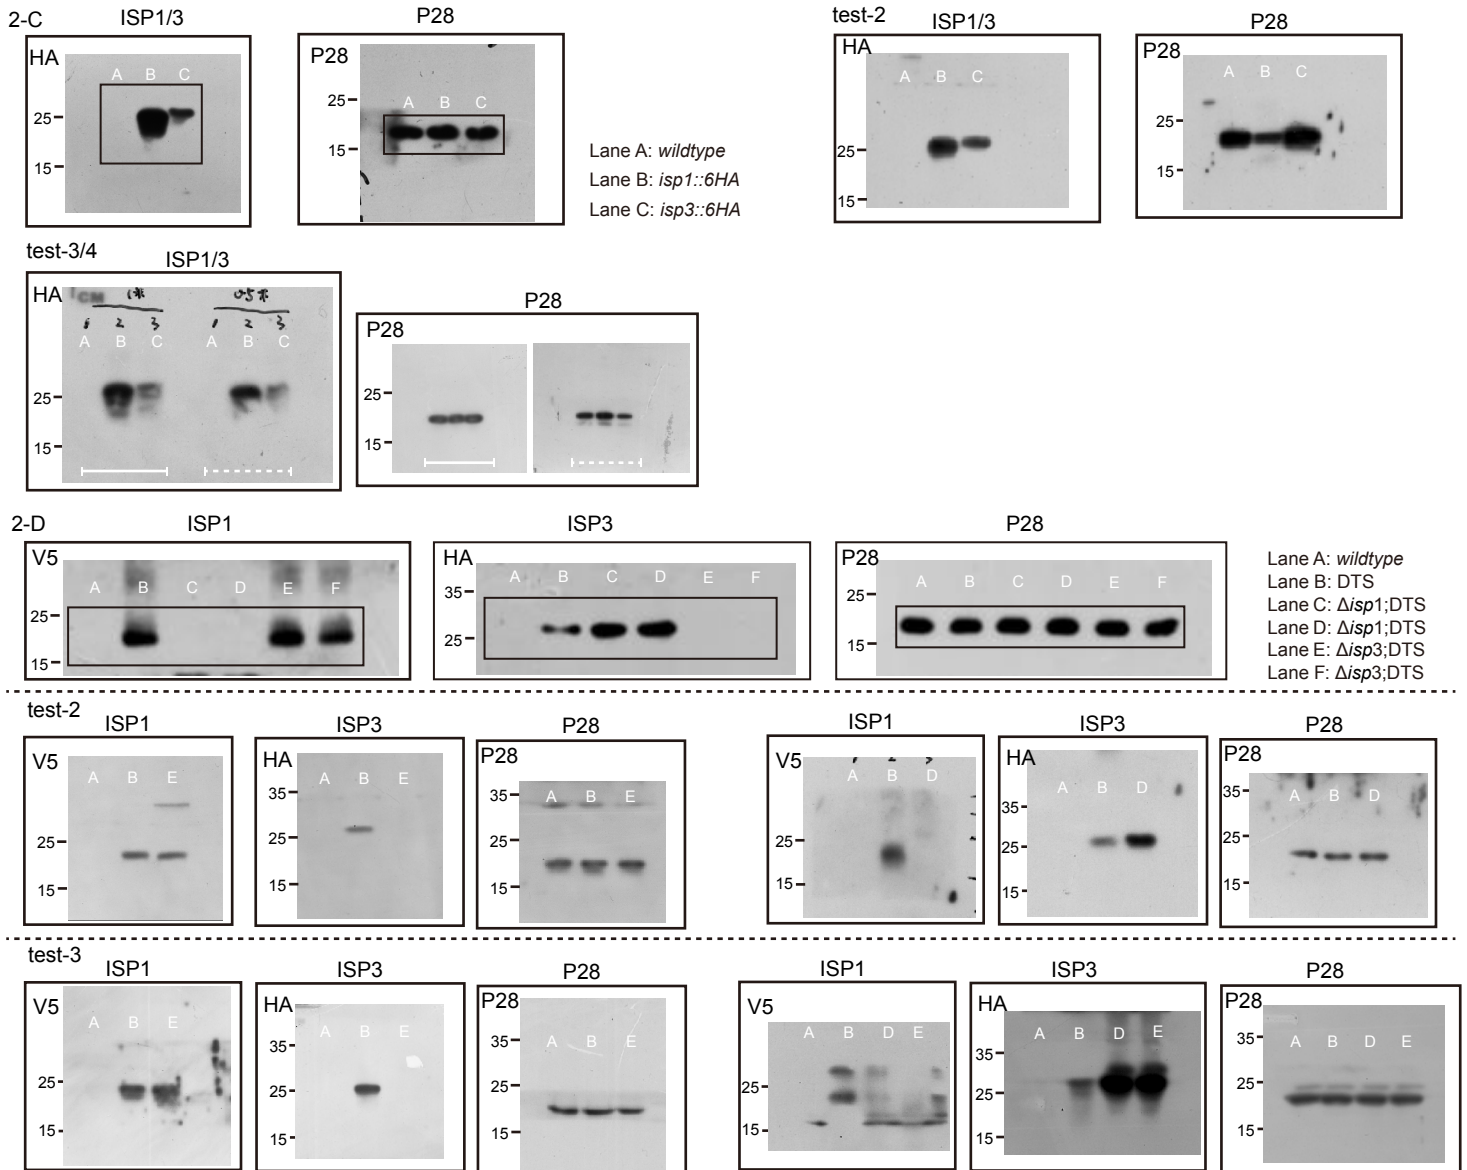

Supplement: EMBJ-39-e104168-s004.pdf [file EMBJ-39-e104168-s004.pdf]
